# Supplementary material for: Combinatorial control of temporal gene expression in the Drosophila wing by enhancers and core promoters
Source: PubMed Central journal article supplement (PMC3641971; doi:10.1186/1471-2164-13-498), 2012-09-20
Supplement: 1471-2164-13-498-S4.pdf [file 1471-2164-13-498-S4.pdf]

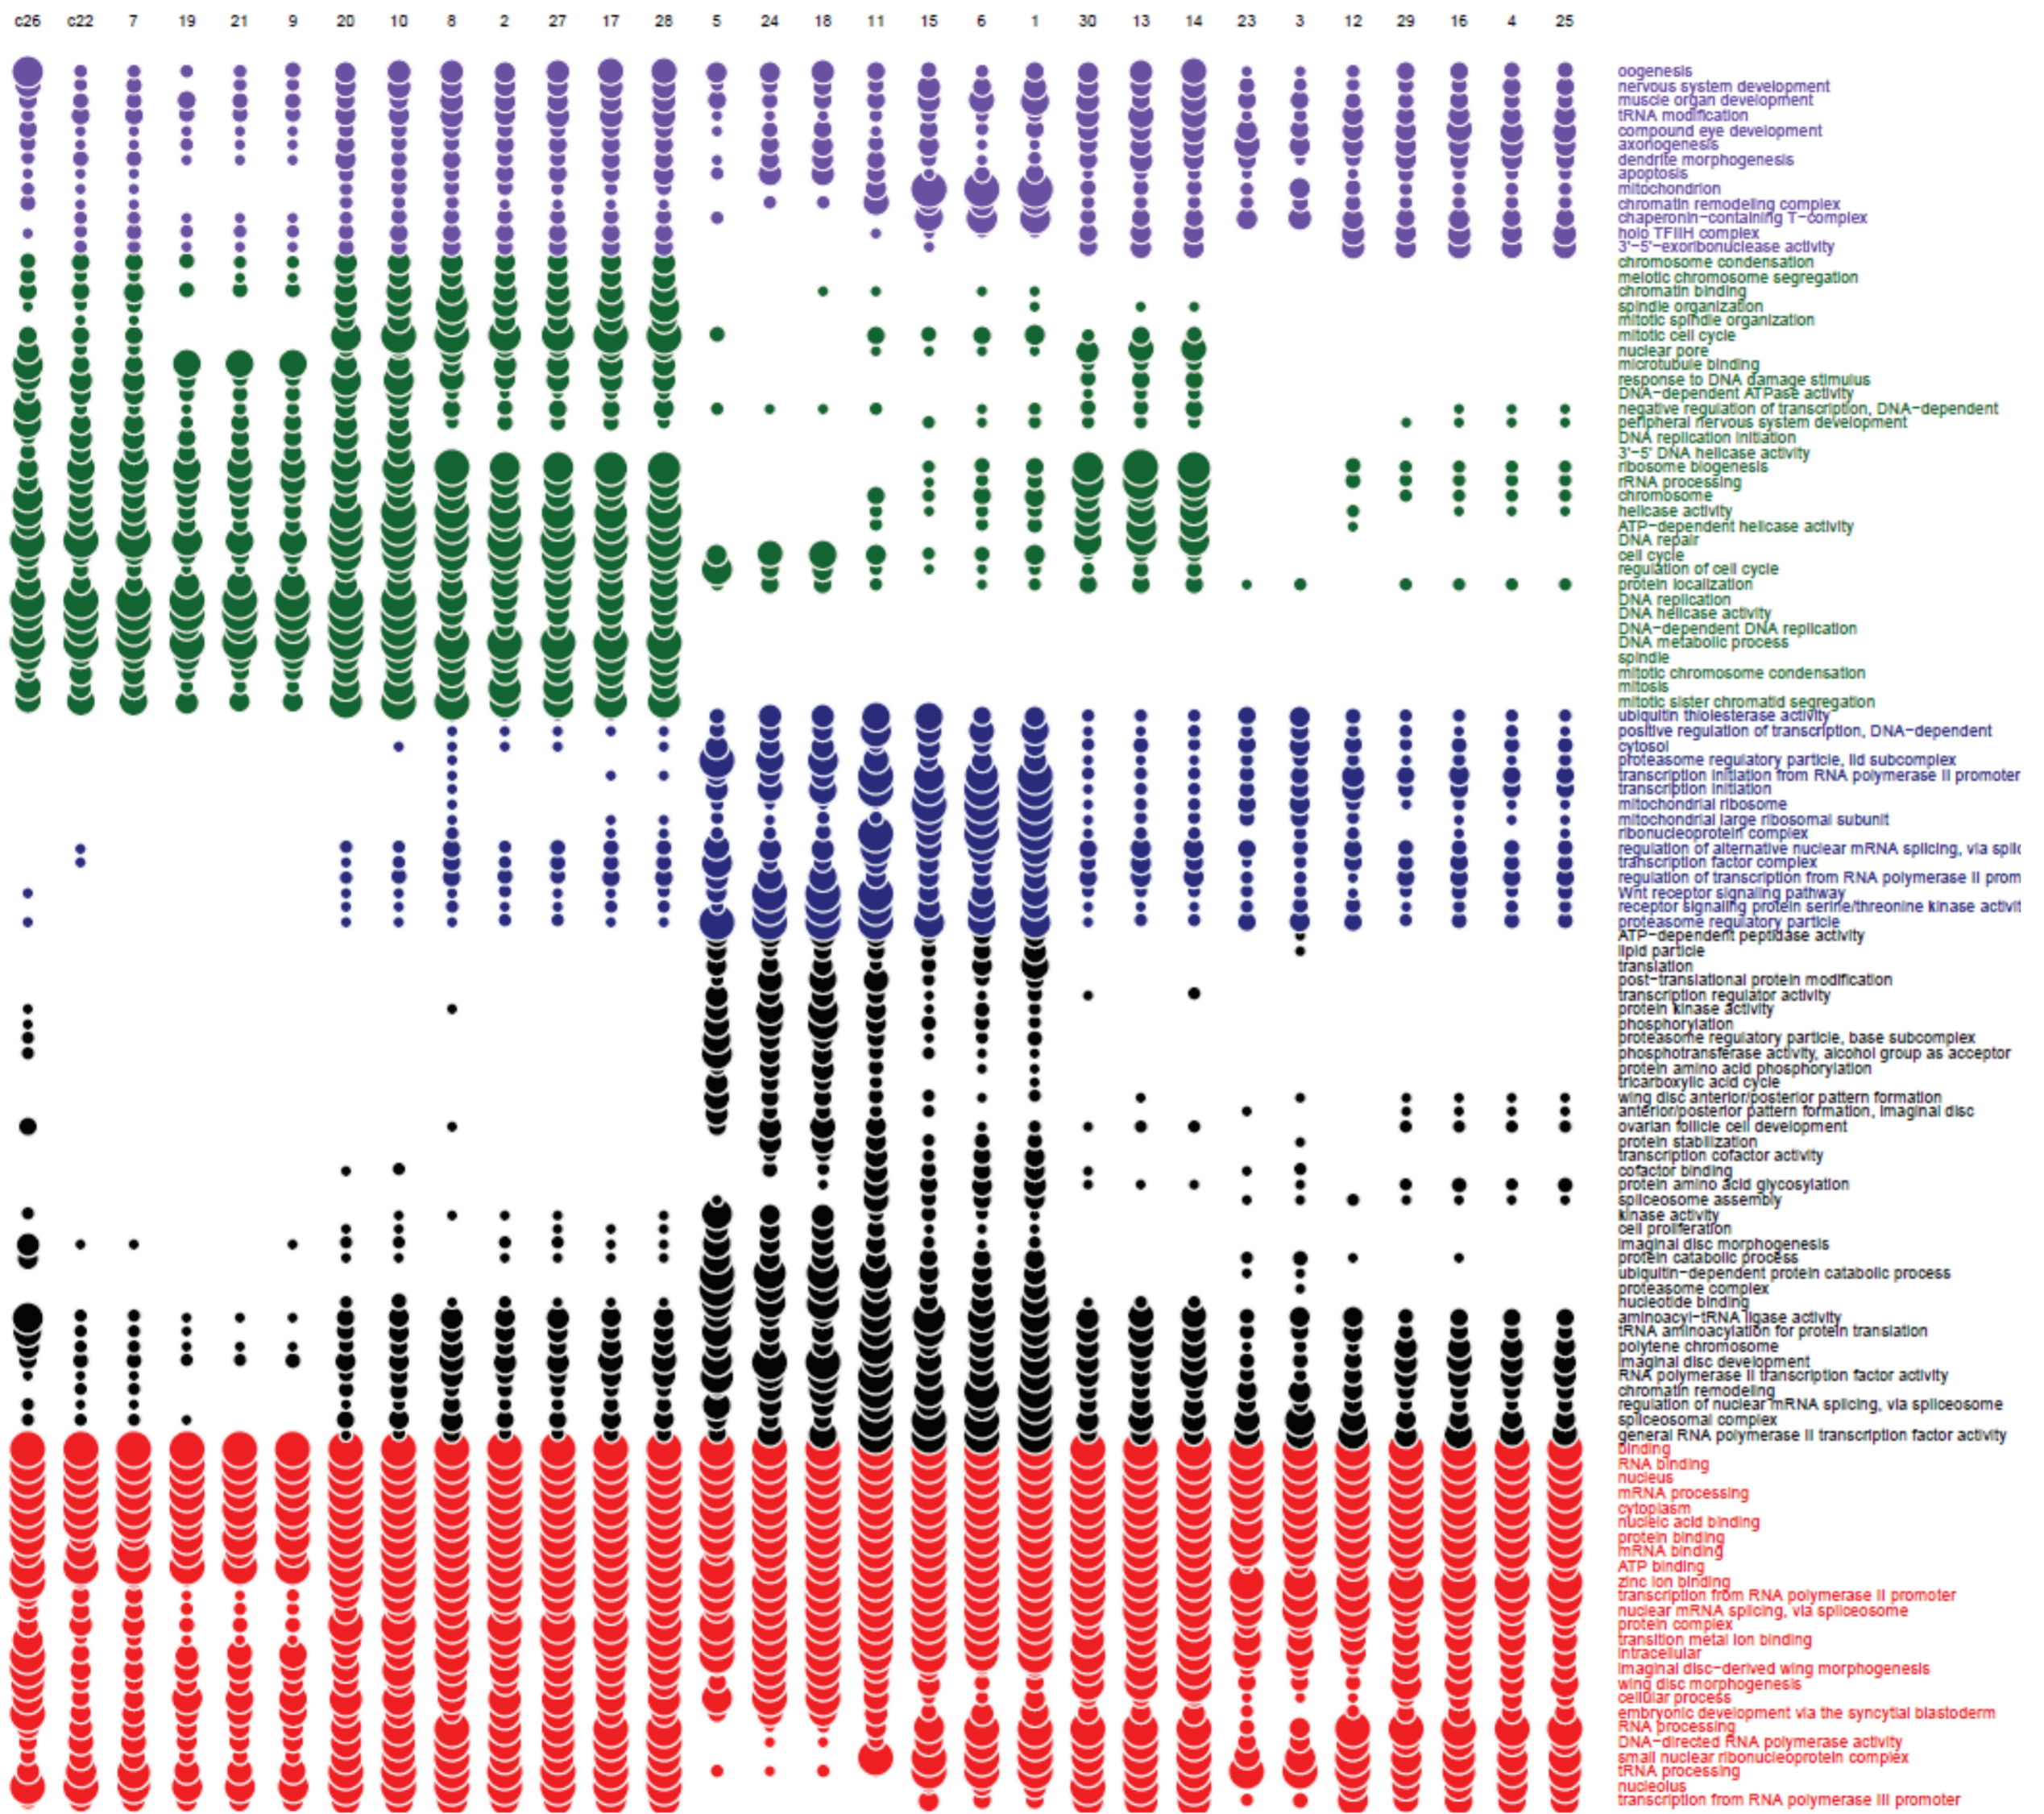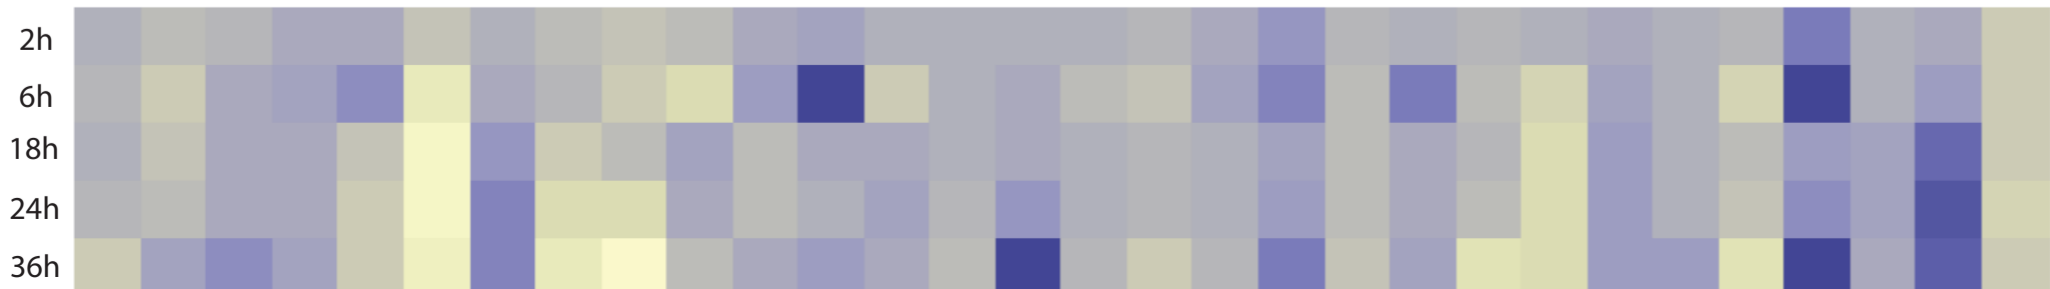

gene expression (blue=enriched)
