# Supplementary material for: Combinatorial control of temporal gene expression in the Drosophila wing by enhancers and core promoters
Source: PubMed Central journal article supplement (PMC3641971; doi:10.1186/1471-2164-13-498), 2012-09-20
Supplement: 1471-2164-13-498-S5.pdf [file 1471-2164-13-498-S5.pdf]

# Additional Motifs

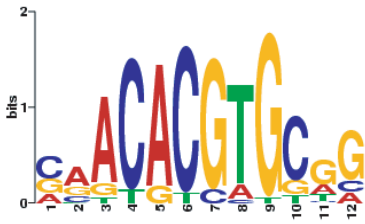

myc

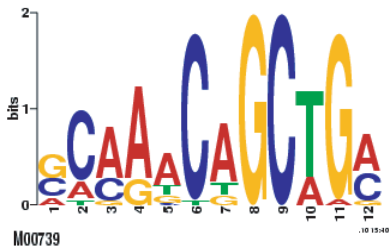

starvation response  
E-box

M00739

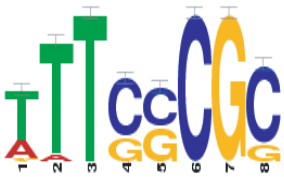

E2F  
transfac

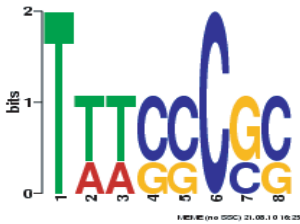

E2F  
*Drosophila*

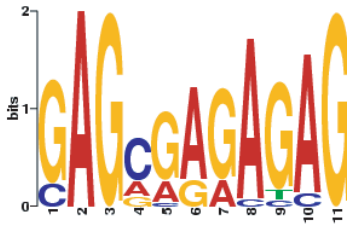

Trl  
q.val. 1.9e-3

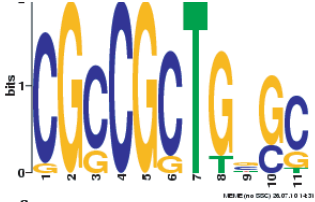

med

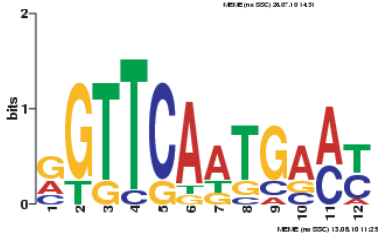

EcR/USP
