# Supplementary material for: Combinatorial control of temporal gene expression in the Drosophila wing by enhancers and core promoters
Source: PubMed Central journal article supplement (PMC3641971; doi:10.1186/1471-2164-13-498), 2012-09-20

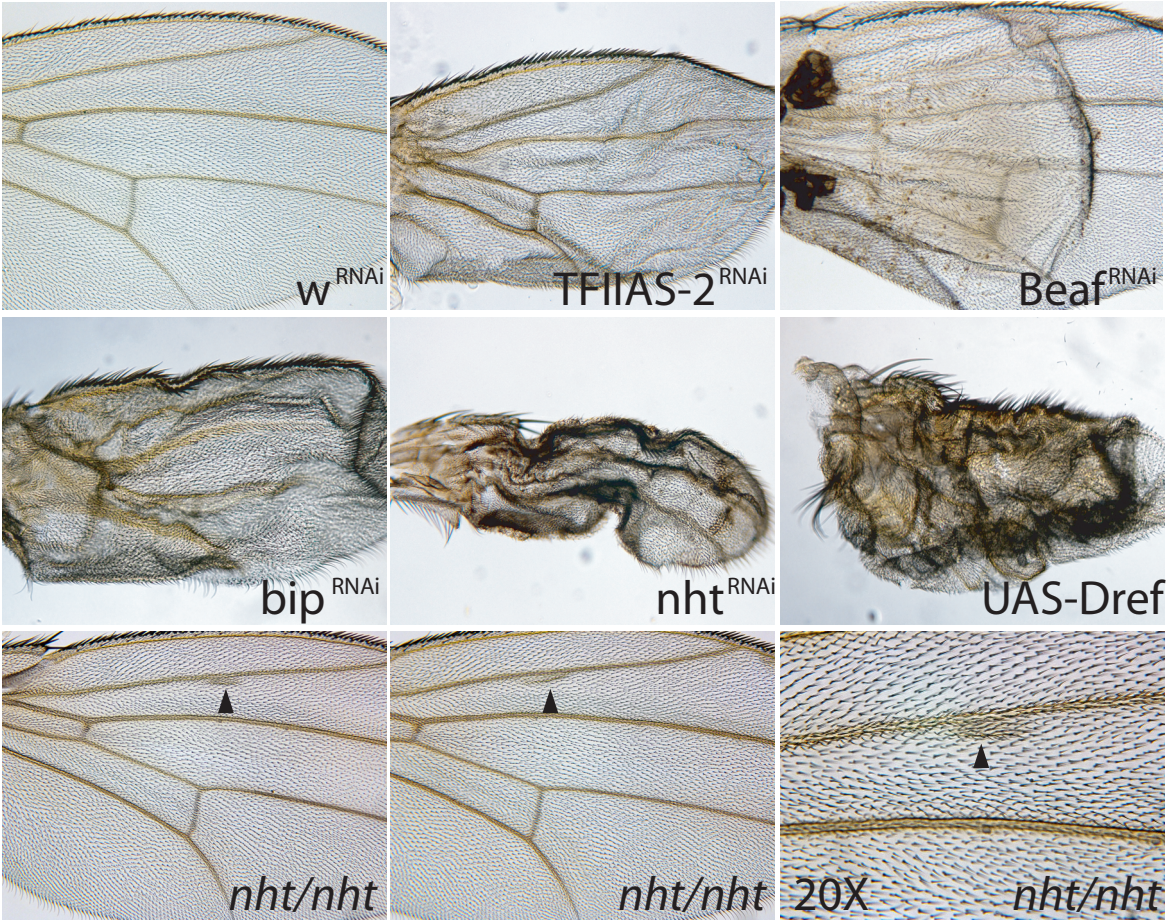

Supplement: 1471-2164-13-498-S8.pdf [file 1471-2164-13-498-S8.pdf]
