# Supplementary material for: Combinatorial control of temporal gene expression in the Drosophila wing by enhancers and core promoters
Source: PubMed Central journal article supplement (PMC3641971; doi:10.1186/1471-2164-13-498), 2012-09-20
Supplement: 1471-2164-13-498-S10.pdf [file 1471-2164-13-498-S10.pdf]

Additional Figure 7

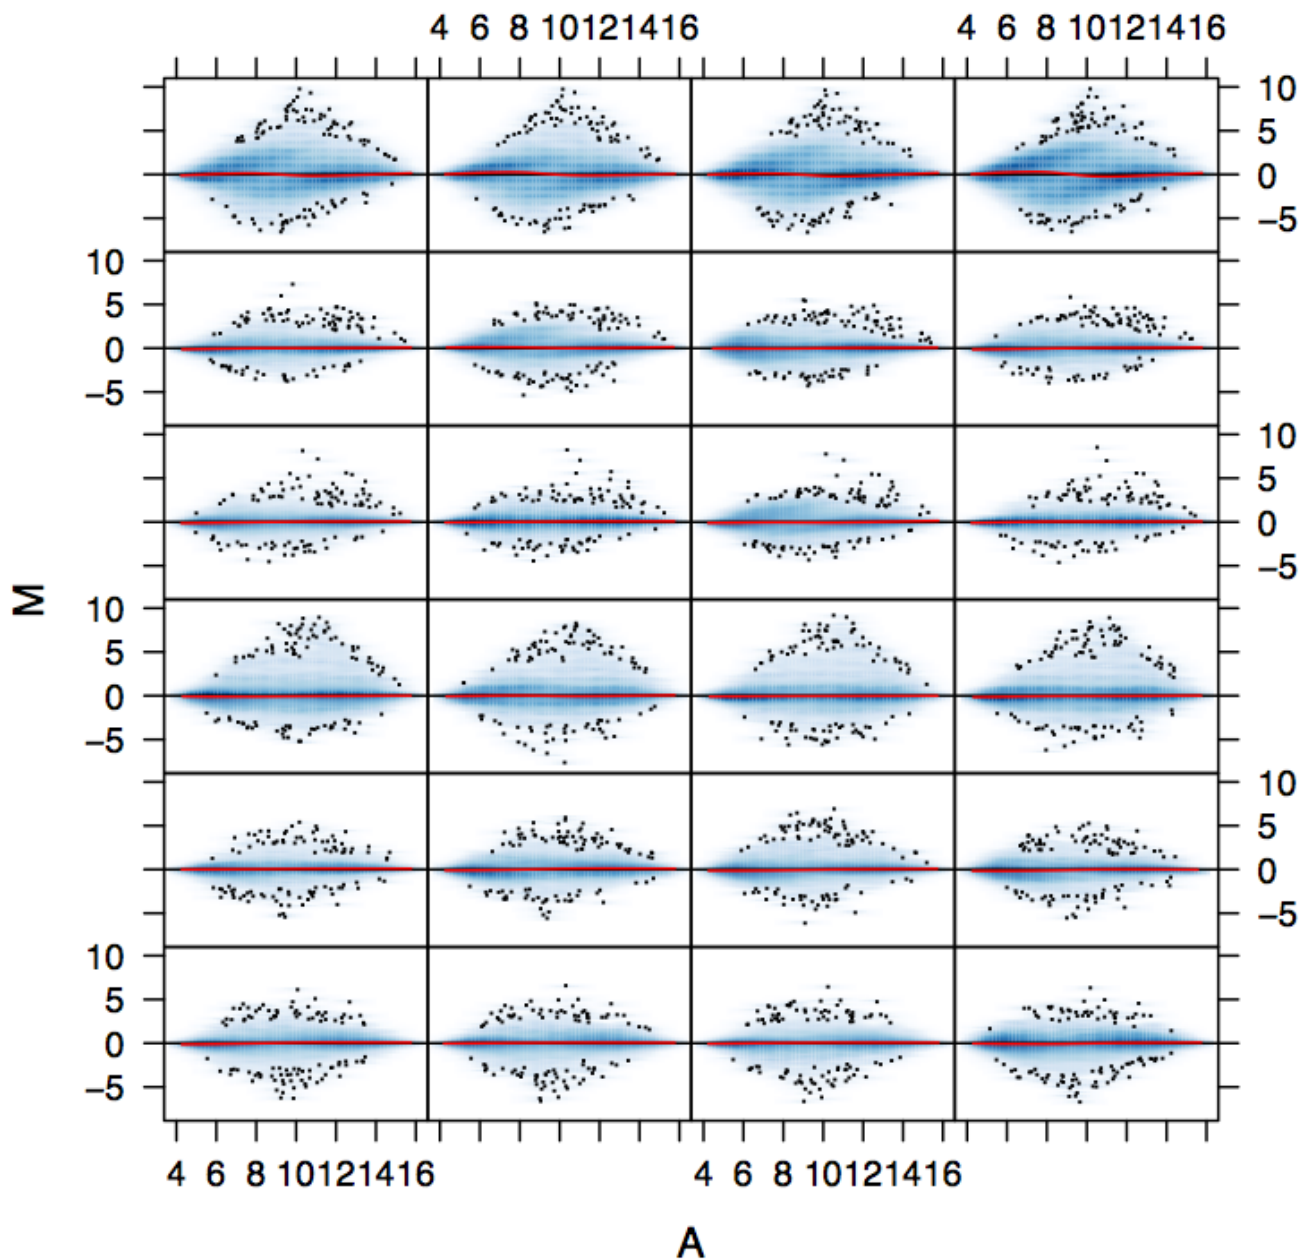

MA Plots of normalized array data. Rows indicate timepoints from late (top) to early (bottom) of L3, 2hr APF, 6 hr APF, 24h APF, and 36h APF (top). Columns are biological replicates for each timepoint.
